# Supplementary material for: Reduced El Niño variability in the mid-Pliocene according to the PlioMIP2 ensemble
Source: Copernicus journal article supplement (doi:10.5194/cp-17-2427-2021), 2021-12-01
Supplement: Supplementary file 1 [file cp-17-2427-2021-supplement.zip]

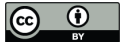

## *Supplement of*

# **Reduced El Niño variability in the mid-Pliocene according to the PlioMIP2 ensemble**

**Arthur M. Oldeman et al.**

*Correspondence to:* Arthur M. Oldeman (a.m.oldeman@uu.nl)

- cp-17-2427-2021-supplement-title-page.pdf
- Supplement v2
  - .DS\_Store
  - selected\_data.xlsx
  - supplement.pdf
- \_\_MACOSX
  - Supplement v2
    - \* .\_.DS\_Store
    - \* .\_selected\_data.xlsx

The copyright of individual parts of the supplement might differ from the article licence.
